# Supplementary figures and images for: Inactivation of the tyrosine phosphatase SHP-2 drives vascular dysfunction in Sepsis
Source: PubMed Central journal article supplement — eBioMedicine. 2019 Mar 21;42:120–32. doi: 10.1016/j.ebiom.2019.03.034 (PMC6491420; doi:10.1016/j.ebiom.2019.03.034), 2019-03-21

S1

**A**

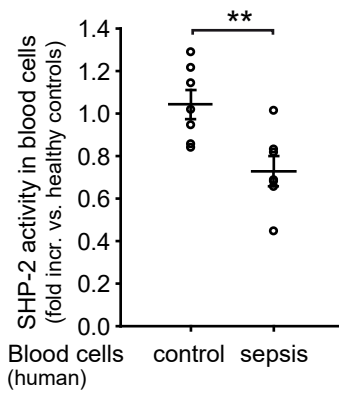

**B**

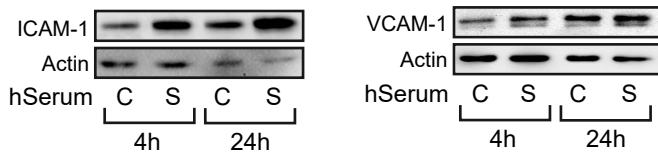

**A**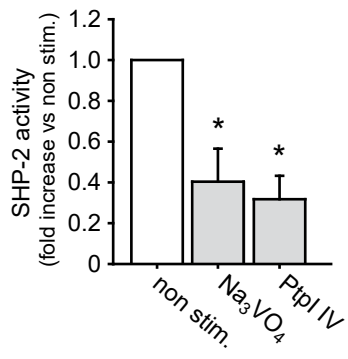**B**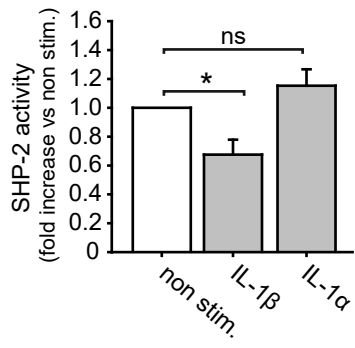



**A**

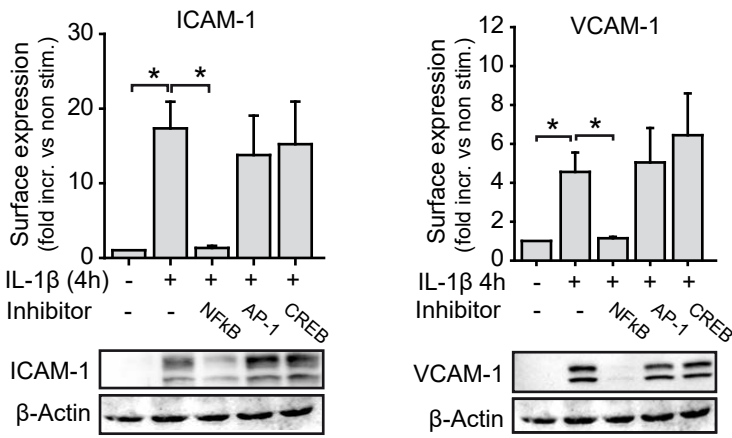

**B**

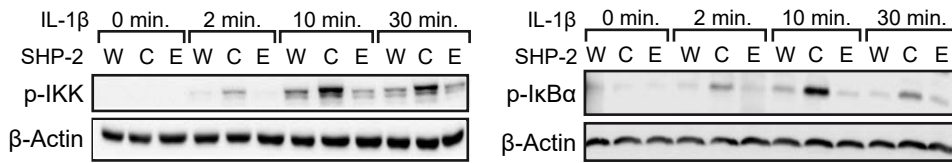

**C**

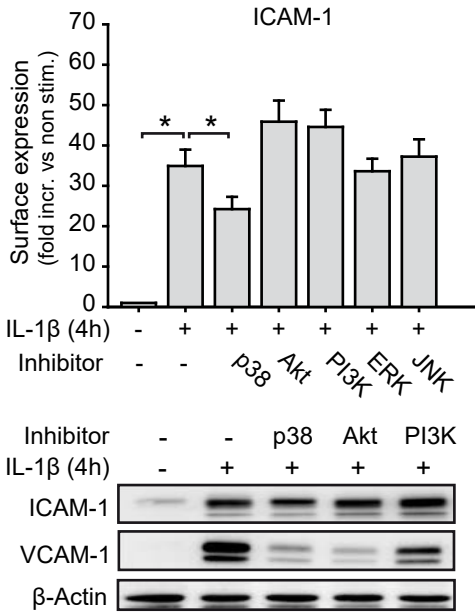

**D**

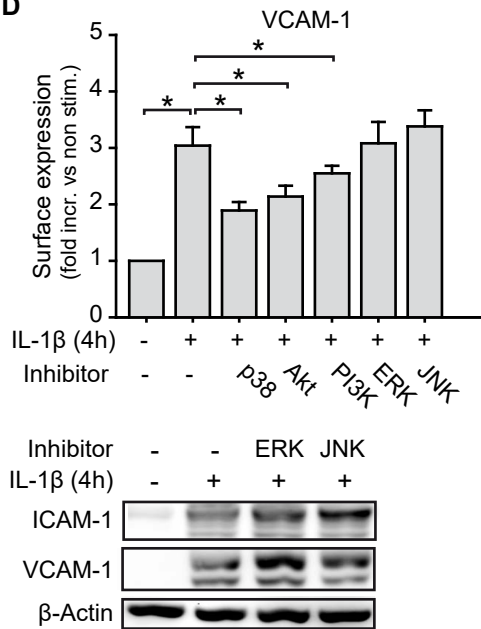

**E**

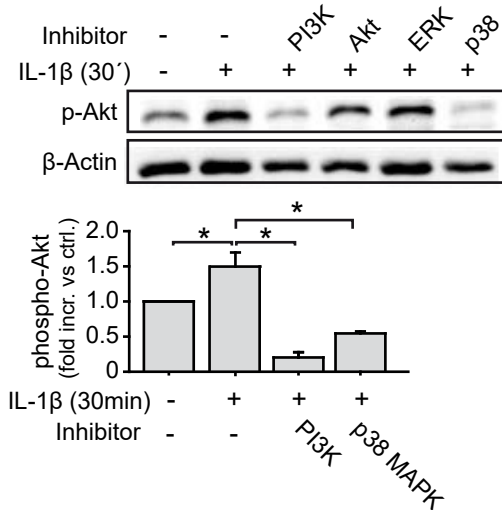

**F**

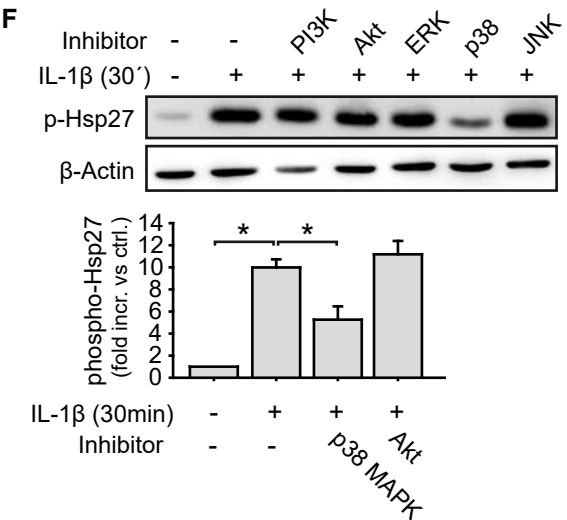

S5

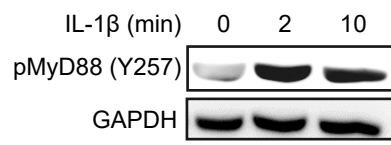

Supplement: mmc2.pdf [file mmc2.pdf]
